# Supplementary material for: (F5PhO)2-F16-SiPc as an air-stable, high-performance n-type semiconductor with poor cannabinoid sensing capabilities
Source: Royal Society of Chemistry journal article supplement (doi:10.1039/d4lf00147h), 2024-01-01
Supplement: d4lf00147h1.pdf [file d4lf00147h1.pdf]

# **(F5PhO)<sub>2</sub>-F16-SiPc as an Air-Stable, High-Performance n-Type Semiconductor with Poor Cannabinoid Sensing Capabilities**

Halyne R. Lamontagne<sup>1,2</sup>, Mélanie Cyr<sup>1,2</sup>, Mário C. Vebber<sup>1</sup>, Sufal Swaraj<sup>3</sup>, Cory S. Harris<sup>4</sup>, Jaclyn L. Brusso<sup>2</sup>, Adam J. Shuhendler<sup>2,4,5\*</sup> and Benoît H. Lessard<sup>1,6\*</sup>

<sup>1</sup>*Department of Chemical and Biological Engineering, University of Ottawa, 161 Louis Pasteur, Ottawa, ON, Canada, K1N 6N5*

<sup>2</sup>*Department of Chemistry and Biomolecular Sciences, University of Ottawa, 150 Louis Pasteur, Ottawa, ON, Canada, K1N 6N5*

<sup>3</sup>*SOLEIL L'Orme des Merisiers, – Départementale 128, Saint-Aubin – 91190 France*

<sup>4</sup>*Department of Biology, University of Ottawa, 30 Marie Curie, Ottawa, ON, Canada, K1N 6N5*

<sup>5</sup>*University of Ottawa Heart Institute, 40 Ruskin St, Ottawa, ON, Canada, K1Y 4W7*

<sup>6</sup>*School of Electrical Engineering and Computer Science, University of Ottawa, 800 King Edward Ave, Ottawa, ON, Canada, K1N 6N5*

\*Corresponding Author: [Benoit.Lessard@uottawa.ca](mailto:Benoit.Lessard@uottawa.ca) (BHL)

**Supporting Information (SI)**

**Table S1.** Comparison of in-air performance of  $(F_5PhO)_2-F_{16}-SiPc$  detailed in this work (BGBC, Au electrodes) with previously reported performance (BGTC, Ag electrodes).

|                                            | This Work                      | Previous Work <sup>13</sup>    |
|--------------------------------------------|--------------------------------|--------------------------------|
| $\mu_e$ (cm <sup>2</sup> /Vs) <sup>a</sup> | $(3.8 \pm 1.0) \times 10^{-2}$ | $(8.1 \pm 0.3) \times 10^{-3}$ |
| $V_T$ (V) <sup>a</sup>                     | $9.9 \pm 1.9$                  | $10.1 \pm 4.1$                 |
| $I_{On/Off}$                               | $10^4 - 10^5$                  | $10^3 - 10^4$                  |
| $I_{On}$ (A) <sup>b</sup>                  | $3.16 \times 10^{-4}$          | $4.91 \times 10^{-6}$          |

<sup>a</sup> $\mu_e$  and  $V_T$  calculated from an average of a minimum of 20 devices; <sup>b</sup> $I_{On}$  taken from the median.

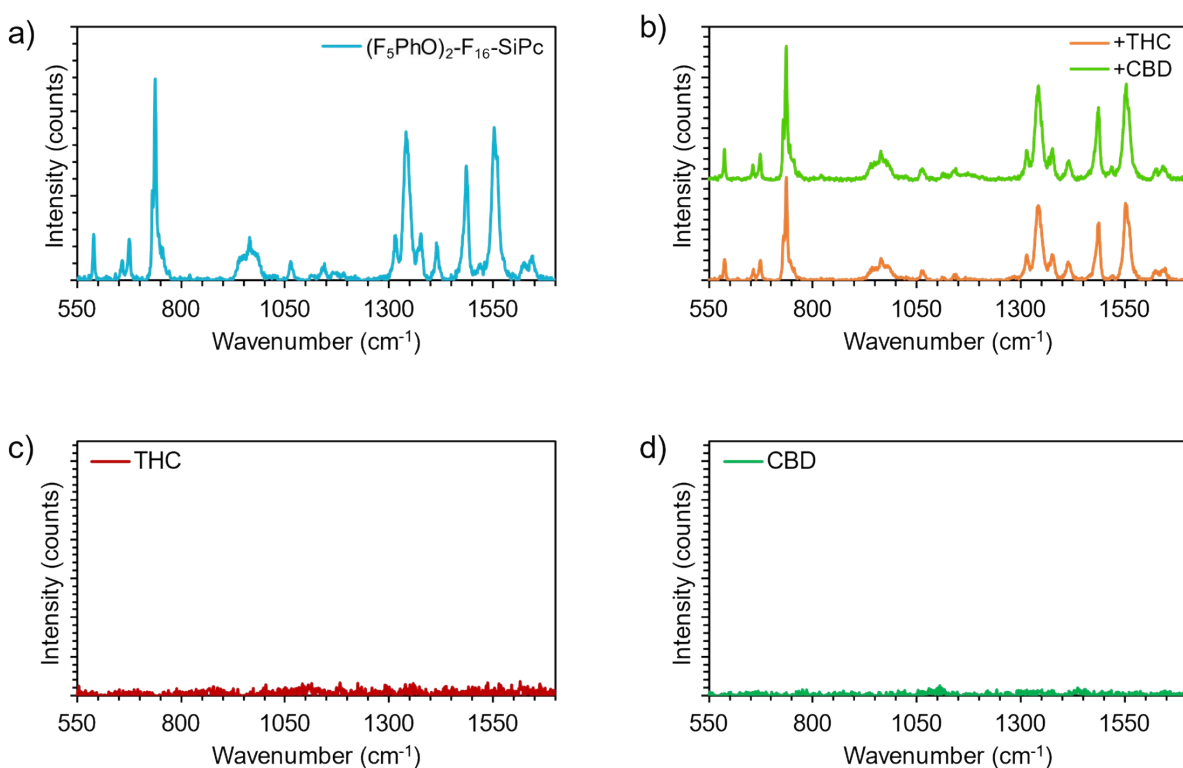

**Figure S1.** Raman spectra of (a)  $(F_5PhO)_2-F_{16}-SiPc$  and (b)  $(F_5PhO)_2-F_{16}-SiPc$  after exposure to THC and CBD. The baseline spectra of (c) THC and (d) CBD are included.
