# Supplementary material for: (F5PhO)2-F16-SiPc as an air-stable, high-performance n-type semiconductor with poor cannabinoid sensing capabilities
Source: Royal Society of Chemistry journal article supplement (doi:10.1039/d4lf00147h), 2024-01-01
Supplement: d4lf00147h2.pdf [file d4lf00147h2.pdf]

Supporting Information Available: The following files are available free of charge.

- F26SiPc-SupportingInfo.docx
  - Comparison of previous  $(F_5PhO)_2-F_{16}$ -SiPc device performance
  - Raman spectra of thin films before and after exposure to THC & CBD
